# Supplementary material for: Differences in the rare variant spectrum among human populations
Source: PLOS journal article supplement (doi:10.1371/journal.pgen.1006581), 2017-02-01

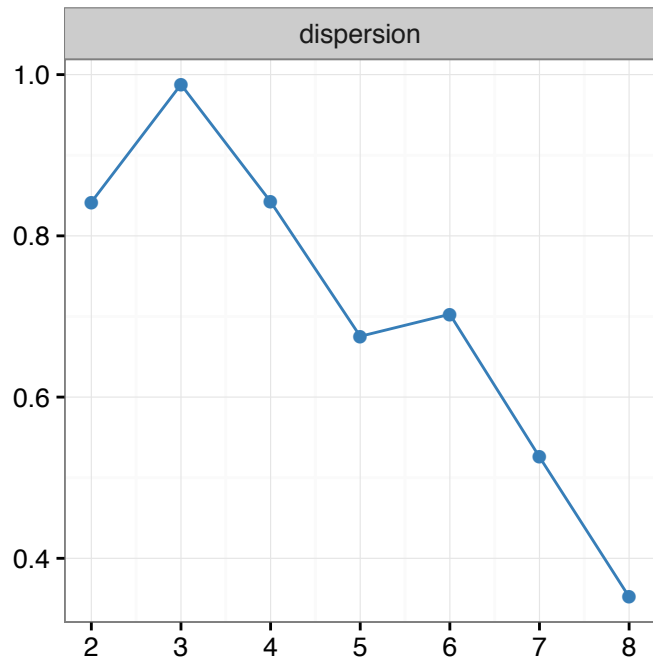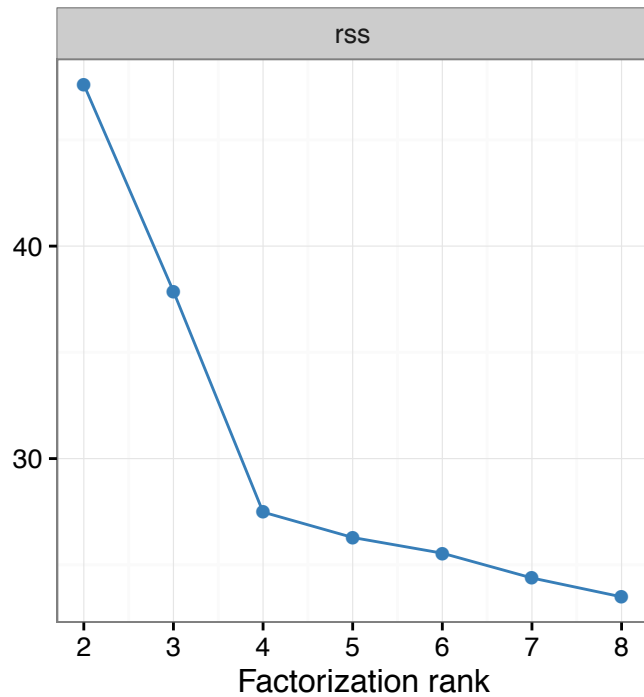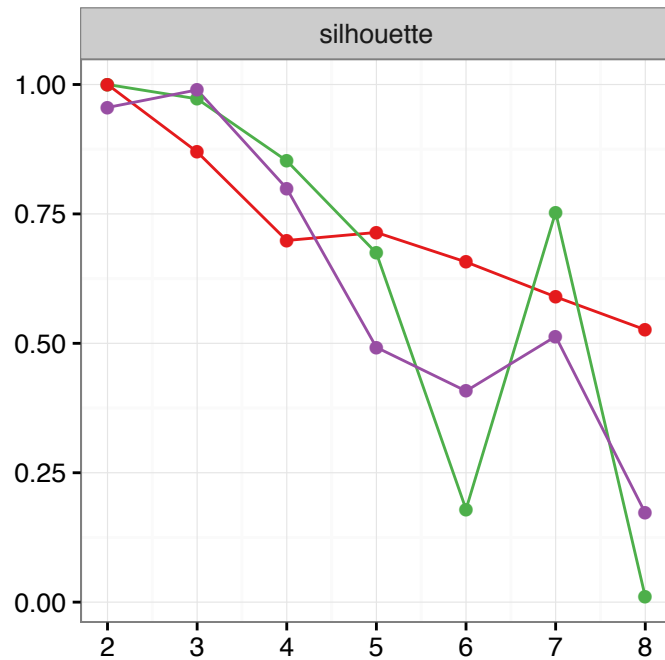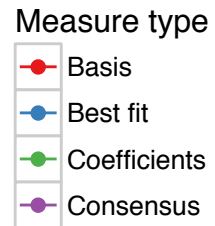

Supplement: S1 (10.1371/journal.pgen.1006581.s001) [file journal.pgen.1006581.s001]
